# Supplementary material
Source: publisher figshare collection journal article supplement (https://rs.figshare.com/ndownloader/files/12270245)
Supplement: Supplementary file 1 [file 12270245]

ID	Sex	FE success yn	FE doors suc	FE doors fail	FE Age	FE BMISeason	FE Lat first suc after contact.capped	FE solving time	M Age	M BMIseason	M error until cri	M Cri yesno	M BMI change	FE BMI change	days alive	survival until Nov17
06D1 3577	f	0	0	6	adult	3.51	937.3	NA	NA	NA	NA	NA	NA	0.79	2583	0
06D1 3C05	f	1	6	0	adult	2.94	39.9	44.8	adult	2.94	34.5	0	0.14	0.14	1065	0
06E4 675A	m	0	0	6	adult	2.56	607.4	NA	NA	NA	NA	NA	NA	0.04	1709	1
06E4 747A	m	0	0	6	adult	3.19	759.7	NA	NA	NA	NA	NA	NA	0.8	1796	0
06E4 9257	f	1	1	5	adult	3.36	224.3	NA	NA	NA	NA	NA	NA	0.45	1071	0
06E4 B281	m	1	4	2	adult	2.91	611.3	185	adult	2.91	17.25	1	-0.09	-0.09	1645	0
06E4 CA48	f	1	4	2	adult	3.35	351.1	274.1	NA	NA	NA	NA	NA	NA	1598	0
06E4 E22C	m	0	0	6	adult	3.24	1142.3	NA	adult	3.24	35.5	0	0.16	0.16	1016	0
06E8 4AEB	m	1	1	5	adult	2.86	195.7	NA	NA	NA	NA	NA	NA	NA	952	0
06E8 5F30	m	1	6	0	adult	2.12	56.7	71.1	adult	2.41	22.5	1	-0.75	-0.75	1030	0
06E8 60C6	m	0	0	6	adult	2.67	1198.8	NA	NA	NA	NA	NA	NA	-0.05	1373	1
06E9 B0D9	f	1	4	2	adult	3.32	79.2	NA	NA	NA	NA	NA	NA	NA	1031	0
06E9 B3B6	f	1	6	0	adult	3.13	12.6	39.1	adult	3.13	8	1	NA	NA	1031	0
06E9 BD43	f	0	0	6	adult	3.3	613.2	NA	adult	3.3	12.75	1	0.53	0.53	883	0
06E9 C7ED	m	1	NA	NA	adult	2.84	42.2	NA	adult	2.84	24.25	1	0.09	0.09	1429	0
06E9 CF62	f	1	6	0	adult	3.57	74.5	24	adult	3.35	30.5	0	0.35	0.35	707	0
06E9 D0F6	f	1	6	0	adult	3.19	38.2	57.7	adult	NA	NA	NA	NA	0.27	2839	1
06E9 D3D3	f	1	6	0	adult	3	29.4	34.3	NA	NA	NA	NA	NA	0.45	1063	0
06E9 D58A	f	0	0	6	adult	3.21	978.4	NA	NA	NA	NA	NA	NA	0.5	1437	0
06E9 D825	f	1	6	0	adult	3.57	76.3	130.4	adult	3.75	16.75	1	1.25	0.98	NA	NA
06E9 E841	f	1	6	0	adult	3.09	9.7	36.7	NA	NA	NA	NA	NA	NA	1073	0
074C 2BF6	f	1	6	0	juvenile	2.4	148.5	33.3	juvenile	2.4	30.75	0	NA	NA	188	0
074D 8885	f	0	0	6	juvenile	2.59	1196	NA	juvenile	2.59	18.25	1	NA	NA	285	0
074D AB56	m	1	6	0	juvenile	2.51	26.6	39.8	juvenile	2.51	33.75	0	NA	NA	698	0
0750 12DD	m	1	6	0	juvenile	2.31	16.8	39.8	juvenile	2.31	9.25	1	NA	NA	629	0
0757 AFF8	m	1	4	2	juvenile	2.26	83.9	366.9	juvenile	2.26	13.5	0	NA	NA	NA	NA
0757 B33B	m	1	6	0	juvenile	2.14	70.2	46	juvenile	2.14	14.5	1	NA	NA	700	0
0757 BB72	f	1	6	0	juvenile	2.14	44.5	208.4	juvenile	2.14	13	1	NA	NA	1006	1
0757 C2AF	m	1	6	0	juvenile	2.36	24.5	184.6	juvenile	2.36	17.5	1	NA	NA	NA	NA
0757 C6DD	f	1	6	0	juvenile	2.34	18.4	56.6	NA	NA	NA	NA	NA	NA	122	0
0757 C8DA	m	1	6	0	adult	2.81	8.5	32.3	adult	2.81	24.5	0	NA	NA	1372	1
075A 6D94	f	1	5	1	juvenile	NA	51.3	263.8	juvenile	2.33	5.5	1	NA	NA	192	0
0757 CFB0	f	1	6	0	adult	3.12	73	32.8	adult	3.12	12.5	1	0.48	0.48	700	0
0757 D09A	f	1	6	0	adult	3.44	59.5	46.9	NA	NA	NA	NA	NA	0.18	700	0
0757 D44E	m	1	6	0	juvenile	2.11	101.6	91.8	juvenile	2.11	4.25	1	NA	NA	285	0
0757 D5E9	f	1	NA	NA	juvenile	2.32	46.4	NA	juvenile	2.32	21.25	1	NA	NA	265	0
0757 D91B	f	1	6	0	juvenile	2.43	84.4	63.1	juvenile	2.43	11.5	1	NA	NA	845	0
0757 E595	m	1	6	0	juvenile	2.28	38.8	51.6	juvenile	2.28	32.25	0	NA	NA	1008	1
0757 E9ED	m	1	6	0	juvenile	2.49	184.7	39.5	NA	NA	NA	NA	NA	NA	NA	NA
0757 EC73	f	1	6	0	juvenile	2.54	33.5	42	juvenile	2.54	3	1	0.19	0.19	NA	NA
0758 035B	m	1	6	0	juvenile	2.43	24.5	95.2	juvenile	2.43	8.25	1	NA	NA	495	0
0759 FEBB	m	1	3	3	juvenile	2.21	109.3	477.7	juvenile	2.21	15	0	NA	NA	1008	1
075A 0343	m	1	6	0	juvenile	2.3	49.1	59.2	juvenile	2.3	0	1	NA	NA	700	0
075A 2285	m	0	0	6	adult	2.71	1129	NA	adult	2.71	2.5	1	0.05	0.05	650	0
075A 2DAA	m	1	6	0	adult	3.07	164.6	119.4	NA	NA	NA	NA	NA	0.44	1008	1
075A 305C	f	1	6	0	juvenile	2.32	8.6	32.4	juvenile	2.32	9	1	NA	NA	223	0
075A 4B99	m	1	6	0	juvenile	2.22	284.7	115.4	juvenile	2.22	14.5	1	NA	NA	NA	NA
075A 4CCD	f	NA	NA	NA	juvenile	NA	NA	NA	juvenile	2.57	15.5	1	NA	NA	700	0
075A 5A40	f	1	6	0	juvenile	2.62	47.8	33	juvenile	2.62	10.5	1	NA	NA	664	0
075A 60F0	m	1	3	3	adult	2.89	40.7	472.2	adult	2.76	18.5	0	0.08	0.08	666	0
075A 6172	m	1	6	0	juvenile	2.51	608.4	54.4	juvenile	2.51	7	1	0.09	0.09	643	1
075A 6243	f	NA	NA	NA	juvenile	NA	NA	NA	juvenile	2.4	4.75	1	NA	NA	NA	NA
075A 63E4	m	1	6	0	juvenile	2.39	106.6	36.9	juvenile	2.39	20.5	0	NA	NA	341	0
075A 693D	f	1	5	1	adult	3.19	16.2	285	adult	3.19	3.75	1	0.92	0.92	852	0
075A 6B08	m	1	4	2	juvenile	2.26	3.5	NA	juvenile	2.26	6.25	1	0.12	0.12	265	0
075A 6E12	m	1	6	0	juvenile	2.27	126.2	23	juvenile	2.27	11	1	NA	NA	630	0
075A 733C	m	1	6	0	juvenile	2.37	23	62.6	juvenile	2.37	23	0	NA	NA	NA	NA
075A 85BD	m	1	6	0	juvenile	2.45	80	50.8	juvenile	2.45	24.75	1	NA	NA	343	0
075A 87E7	m	0	0	6	juvenile	2.57	1181.1	NA	juvenile	2.57	5.25	1	NA	NA	NA	NA
075A 93B9	f	1	2	4	juvenile	2.55	19.2	1098.8	juvenile	2.55	11.25	1	NA	NA	222	0
075B 867D	f	1	6	0	adult	3.06	603.9	42.5	NA	NA	NA	NA	NA	0.28	700	0
075B 996C	f	1	6	0	juvenile	2.31	27.4	45	juvenile	2.31	11.25	1	NA	NA	390	0
075B BA22	f	0	0	6	juvenile	2.91	796	NA	juvenile	2.91	32.75	0	0.11	0.11	480	0
075B DC33	f	1	4	2	juvenile	2.62	46.3	322.2	juvenile	2.62	18	1	NA	NA	153	0
075D FB23	f	0	0	6	adult	3.2	1184.6	NA	NA	NA	NA	NA	NA	-0.11	700	0
075D FB9C	f	1	1	5	juvenile	1.92	277.6	NA	juvenile	1.92	36.75	0	NA	NA	489	0
075D FDC1	m	1	4	2	adult	2.82	249.6	299.6	adult	2.37	15.75	1	0.23	0.23	1372	1
075E 027B	m	1	6	0	juvenile	2.42	68	53.7	NA	NA	NA	NA	NA	NA	NA	NA
075E 02AB	m	1	6	0	juvenile	2.54	13.5	131.3	NA	NA	NA	NA	NA	NA	630	0
075E 046D	f	1	5	1	juvenile	2.82	28.2	236.5	juvenile	2.82	12.75	0	0.17	0.17	335	0
075E 0500	f	1	6	0	juvenile	2.74	25.9	120.3	juvenile	2.74	11.5	1	NA	NA	222	0
075E 061C	m	1	4	2	juvenile	2.36	512.1	161.4	juvenile	2.36	17.5	0	NA	NA	525	0
0769 0D93	f	1	6	0	juvenile	2.47	43.4	164.9	juvenile	2.47	5.25	1	NA	NA	505	1
0769 0DA0	m	1	1	5	juvenile	2.51	202.3	NA	NA	NA	NA	NA	NA	NA	643	1
0769 0F33	m	1	5	1	adult	3.06	47.8	283.2	NA	NA	NA	NA	NA	NA	516	0
076B 3707	f	1	4	2	adult	3.4	91.5	296.7	adult	3.4	11	1	1.09	1.09	841	0
076D 561F	m	1	6	0	juvenile	2.34	12.8	45.4	juvenile	2.34	25	1	NA	NA	390	0
076D 61B8	m	1	6	0	juvenile	2.64	118.4	26.8	NA	NA	NA	NA	NA	NA	NA	NA
076D 6DA8	f	1	5	1	juvenile	2.79	234.8	228.3	juvenile	2.66	7.25	1	1.04	1.04	285	0
0770 01A3	m	1	5	1	juvenile	2.32	58.5	140	juvenile	2.32	7.5	1	-0.06	-0.06	334	0
0770 078E	f	1	6	0	juvenile	2.49	7.9	58.4	juvenile	2.49	6.5	1	NA	NA	299	0
0770 B305	m	1	6	0	juvenile	2.52	42.2	35.5	juvenile	2.52	9.75	1	0	0	643	1
0770 B321	m	1	5	1	juvenile	2.22	57.2	285.6	juvenile	2.22	7.5	1	NA	NA	NA	NA
0770 B5F1	m	1	6	0	juvenile	2.64	12	39	juvenile	2.64	10.5	0	-0.04	-0.04	598	1
0770 B660	m	1	6	0	adult	2.8	41.6	186	adult	2.8	4	1	0.03	0.03	870	1
0770 B6C2	m	1	5	1	juvenile	2.62	89.3	232	juvenile	2.62	15	0	0.19	0.19	643	1
0770 B7B8	f	1	6	0	juvenile	2.91	16.9	69.1	juvenile	2.91	10.5	1	NA	NA	335	0
0770 B7E6	m	1	6	0	juvenile	2.59	27.4	35.3	juvenile	2.59	10.5	1	0.07	0.07	643	1
0770 B848	m	1	6	0	juvenile	2.58	90.6	27.2	juvenile	2.58	10	0	-0.12	-0.12	643	1
0770 B8FE	m	1	6	0	juvenile	2.1	97.6	54.6	juvenile	2.1	4.75	1	-0.12	-0.12	290	0
0770 B997	m	1	6	0	juvenile	2.57	39.4	165.2	juvenile	2.57	6	1	NA	NA	NA	NA
0770 B9FE	m	1	6	0	juvenile	2.5	29.3	36.6	juvenile	2.5	10.25	0	0.24	0.24	615	1
0770 BD84	f	1	6	0	juvenile	2.06	32.9	56.3	juvenile	2.06	21.25	0	NA	NA	301	0
0770 DD35	f	1	6	0	juvenile	2.38	51.8	29.2	juvenile	2.38	7.25	1	0.24	0.24	643	1
0770 E004	f	1	6	0	juvenile	2.46	82.6	34.8	NA	NA	NA	NA	NA	NA	290	0
0770 E11F	f	1	3	3	juvenile	2.66	203.7	483.8	NA	NA	NA	NA	NA	0.29	480	0
0770 E1FC	m	1	6	0	juvenile	2.41	26.7	37.3	NA	NA	NA	NA	NA	NA	NA	NA
0770 E2F1	m	1	6	0	juvenile	2.27	16.5	26	juvenile	2.27	9.25	1	NA	NA	NA	NA
0770 E366	m	1	5	1	juvenile	2.53	59.7	273.4	juvenile	2.53	5.5	1	-0.06	-0.06	475	0
